# Supplementary material for: Determinants of inter-practice variation in ADHD diagnosis and stimulant prescribing: cross-sectional database study of a national surveillance network
Source: PubMed Central journal article supplement (PMC6678046; doi:10.1136/bmjebm-2018-111133), 2019-02-14
Supplement: bmjebm-2018-111133supp001.pdf [file bmjebm-2018-111133supp001.pdf]

## Appendix 1 – READ codes used for ADHD diagnosis

| Read code v2 | Description                                               |
|--------------|-----------------------------------------------------------|
| Eu9y700      | [X]Attention deficit disorder                             |
| ZS91.12      | [X]Attention deficit disorder                             |
| Eu90011      | [X]Attention deficit hyperactivity disorder               |
| Eu90100      | [X]Hyperkinetic conduct disorder                          |
| Eu90111      | [X]Hyperkinetic disorder associated with conduct disorder |
| Eu90z00      | [X]Hyperkinetic disorder, unspecified                     |
| Eu90.00      | [X]Hyperkinetic disorders                                 |
| Eu90z12      | [X]Hyperkinetic syndrome NOS                              |
| Eu90y00      | [X]Other hyperkinetic disorders                           |
| ZS91.11      | ADD - Attention deficit disorder                          |
| ZS91.00      | Attention deficit disorder                                |
| E2E0100      | Attention deficit with hyperactivity                      |
| E2E0000      | Attention deficit without hyperactivity                   |
| E2E0.00      | Child attention deficit disorder                          |
| E2E0z00      | Child attention deficit disorder                          |
| NOS E2E..00  | Childhood hyperkinetic syndrome                           |
| E2E2.00      | Hyperkinetic conduct disorder                             |
| E2Ez.00      | Hyperkinetic syndrome                                     |
| NOS 1BR..00  | Reduced concentration                                     |
| 1BR0.11      | Short attention span                                      |
| Z7C5312      | Short attention span                                      |
