# Supplementary material for: Determinants of inter-practice variation in ADHD diagnosis and stimulant prescribing: cross-sectional database study of a national surveillance network
Source: PubMed Central journal article supplement (PMC6678046; doi:10.1136/bmjebm-2018-111133), 2019-02-14
Supplement: bmjebm-2018-111133supp002.pdf [file bmjebm-2018-111133supp002.pdf]

**Appendix 2 - EMIS and READ codes used for stimulant medications recommended at the time of our study (1<sup>st</sup> Jan - 31<sup>st</sup> December 2016)**

| <b>Category</b> | <b>Read Code</b> | <b>Term198</b>                                 |
|-----------------|------------------|------------------------------------------------|
| Methylphenidate | dw1G.            | MEDIKINET XL 30mg m/r capsules                 |
| Methylphenidate | dw1H.            | MEDIKINET XL 40mg m/r capsules                 |
| Methylphenidate | dw1I.            | CONCERTA XL 27mg m/r tablets                   |
| Methylphenidate | dw1J.            | MEDIKINET 5mg tablets                          |
| Methylphenidate | dw1K.            | MEDIKINET 10mg tablets                         |
| Methylphenidate | dw1L.            | MEDIKINET 20mg tablets                         |
| Methylphenidate | dw1n.            | METHYLPHENIDATE HYDROCHLORIDE 54mg m/r tablets |
| Methylphenidate | dw1F.            | MEDIKINET XL 20mg m/r capsules                 |
| Methylphenidate | dw1E.            | MEDIKINET XL 10mg m/r capsules                 |
| Methylphenidate | dw1D.            | EQUASYM XL 30mg m/r capsules                   |
| Methylphenidate | dw1C.            | EQUASYM XL 10mg m/r capsules                   |
| Methylphenidate | dw1B.            | *TRANQUILYN 20mg tablets                       |
| Methylphenidate | dw1A.            | *TRANQUILYN 10mg tablets                       |
| Methylphenidate | dw19.            | *TRANQUILYN 5mg tablets                        |
| Methylphenidate | dw18.            | CONCERTA XL 36mg m/r tablets                   |
| Methylphenidate | dw17.            | CONCERTA XL 18mg m/r tablets                   |
| Methylphenidate | dw16.            | EQUASYM XL 20mg m/r capsules                   |
| Methylphenidate | dw15.            | *EQUASYM 10mg tablets                          |
| Methylphenidate | dw14.            | *EQUASYM 20mg tablets                          |
| Methylphenidate | dw13.            | *EQUASYM 5mg tablets                           |
| Methylphenidate | dw12.            | RITALIN 10mg tablets                           |
| Methylphenidate | dw11.            | METHYLPHENIDATE HYDROCHLORIDE 10mg tablets     |
| Methylphenidate | dc1z.            | DEXAMPHETAMINE SULPHATE 20mg m/r capsules      |
| Methylphenidate | dc1y.            | DEXAMPHETAMINE SULPHATE 12.5mg m/r capsules    |
| Methylphenidate | dc1x.            | DEXAMPHETAMINE SULPHATE 7.5mg m/r capsules     |
| Methylphenidate | dc1w.            | DEXAMFETAMINE SULFATE 5mg tablets              |

|                 |       |                                                 |
|-----------------|-------|-------------------------------------------------|
| Methylphenidate | dc1v. | DEXAMFETAMINE SULFATE 1mg/mL oral solution      |
| Methylphenidate | dc14. | *DUROPHET 20mg m/r capsules                     |
| Methylphenidate | dc13. | *DUROPHET 12.5mg m/r capsules                   |
| Methylphenidate | dc12. | *DUROPHET 7.5mg m/r capsules                    |
| Methylphenidate | dc11. | *DEXEDRINE 5mg tablets                          |
| Methylphenidate | dw1O. | MEDIKINET XL 60mg m/r capsules                  |
| Methylphenidate | dw1p. | METHYLPHENIDATE HYDROCHLORIDE 60mg m/r capsules |
| Methylphenidate | dw1Q. | MATORIDE XL 36mg m/r tablets                    |
| Methylphenidate | dw1R. | MATORIDE XL 54mg m/r tablets                    |
| Methylphenidate | dw1s. | METHYLPHENIDATE HYDROCHLORIDE 40mg m/r capsules |
| Methylphenidate | dw1T. | XENIDATE XL 36mg m/r tablets                    |
| Methylphenidate | dw1u. | METHYLPHENIDATE HYDROCHLORIDE 30mg m/r capsules |
| Methylphenidate | dw1v. | METHYLPHENIDATE HYDROCHLORIDE 36mg m/r tablets  |
| Methylphenidate | dw1w. | METHYLPHENIDATE HYDROCHLORIDE 18mg m/r tablets  |
| Methylphenidate | dw1x. | METHYLPHENIDATE HYDROCHLORIDE 20mg m/r capsules |
| Methylphenidate | dw1y. | METHYLPHENIDATE HYDROCHLORIDE 5mg tablets       |
| Methylphenidate | dw1z. | METHYLPHENIDATE HYDROCHLORIDE 20mg tablets      |

| Category       | EMIS Preparation Code | Preparation Description                                   | Approved Name/ Description   |
|----------------|-----------------------|-----------------------------------------------------------|------------------------------|
| Dexamphetamine | ADM/38535NEMIS        | Adderall Xr M/R capsules 5 mg                             | Adderall Xr                  |
| Dexamphetamine | ADM/38536NEMIS        | Adderall Xr M/R capsules 30 mg                            | Adderall Xr                  |
| Dexamphetamine | ADM/38538NEMIS        | Adderall Xr M/R capsules 25 mg                            | Adderall Xr                  |
| Dexamphetamine | ADM/38540NEMIS        | Adderall Xr M/R capsules 20 mg                            | Adderall Xr                  |
| Dexamphetamine | ADM/38542NEMIS        | Adderall Xr M/R capsules 15 mg                            | Adderall Xr                  |
| Dexamphetamine | ADM/38543NEMIS        | Adderall Xr M/R capsules 10 mg                            | Adderall Xr                  |
| Dexamphetamine | AMM/38505NEMIS        | Amfetamine And Dexamfetamine M/R capsules 5 mg + 5 mg     | Amfetamine And Dexamfetamine |
| Dexamphetamine | AMM/38525NEMIS        | Amfetamine And Dexamfetamine M/R capsules 7.5 mg + 7.5 mg | Amfetamine And Dexamfetamine |

|                 |                 |                                                             |                              |
|-----------------|-----------------|-------------------------------------------------------------|------------------------------|
| Dexamphetamine  | AMM/38528NEMIS  | Amfetamine And Dexamfetamine M/R capsules 10 mg + 10 mg     | Amfetamine And Dexamfetamine |
| Dexamphetamine  | AMM/38531NEMIS  | Amfetamine And Dexamfetamine M/R capsules 12.5 mg + 12.5 mg | Amfetamine And Dexamfetamine |
| Dexamphetamine  | AMM/38532NEMIS  | Amfetamine And Dexamfetamine M/R capsules 15 mg + 15 mg     | Amfetamine And Dexamfetamine |
| Dexamphetamine  | AMM/38533NEMIS  | Amfetamine And Dexamfetamine M/R capsules 2.5 mg + 2.5 mg   | Amfetamine And Dexamfetamine |
| Dexamphetamine  | AMTA105019NEMIS | Amfexa Tablets 5 mg                                         | Amfexa                       |
| Dexamphetamine  | AMTA117765NEMIS | Amfexa Tablets 20 mg                                        | Amfexa                       |
| Dexamphetamine  | AMTA117766NEMIS | Amfexa Tablets 10 mg                                        | Amfexa                       |
| Dexamphetamine  | DEM/16182NEMIS  | Dexamphetamine Sulfate M/R capsules 15 mg                   | Dexamphetamine Sulfate       |
| Dexamphetamine  | DEM/17620NEMIS  | Dexamfetamine M/R capsules 15 mg                            | Dexamfetamine                |
| Dexamphetamine  | DEOR21158NEMIS  | Dexamfetamine Oral solution 5 mg/5 ml                       | Dexamfetamine                |
| Dexamphetamine  | DEOR45620NEMIS  | Dexamfetamine Oral suspension 5 mg/5 ml                     | Dexamfetamine                |
| Dexamphetamine  | DEOR90855NEMIS  | Dexamfetamine Oral Solution, Sugar Free 5 mg/5 ml           | Dexamfetamine                |
| Dexamphetamine  | DESP16183NEMIS  | Dexedrine Spansules 15 mg                                   | Dexedrine                    |
| Dexamphetamine  | DETA117763NEMIS | Dexamfetamine Tablets 10 mg                                 | Dexamfetamine                |
| Dexamphetamine  | DETA117764NEMIS | Dexamfetamine Tablets 20 mg                                 | Dexamfetamine                |
| Dexamphetamine  | DETA17621NEMIS  | Dexamfetamine Tablets 5 mg                                  | Dexamfetamine                |
| Dexamphetamine  | DETA3413        | Dexedrine Tablets 5 mg                                      | Dexedrine                    |
| Dexamphetamine  | DETA4815        | Dexamphetamine Sulfate Tablets 5 mg                         | Dexamphetamine Sulfate       |
| Methylphenidate | COM/101185NEMIS | Concerta XI M/R tablets 54 mg                               | Concerta XI                  |
| Methylphenidate | COM/12672NEMIS  | Concerta XI M/R tablets 18 mg                               | Concerta XI                  |
| Methylphenidate | COM/12674NEMIS  | Concerta XI M/R tablets 36 mg                               | Concerta XI                  |
| Methylphenidate | COM/23819NEMIS  | Concerta M/R tablets 27 mg                                  | Concerta                     |
| Methylphenidate | COM/25051NEMIS  | Concerta XI M/R tablets 27 mg                               | Concerta XI                  |
| Methylphenidate | DEM/120497NEMIS | Delmosart M/R tablets 18 mg                                 | Delmosart                    |
| Methylphenidate | DEM/120498NEMIS | Delmosart M/R tablets 27 mg                                 | Delmosart                    |
| Methylphenidate | DEM/120499NEMIS | Delmosart M/R tablets 36 mg                                 | Delmosart                    |
| Methylphenidate | DEM/120500NEMIS | Delmosart M/R tablets 54 mg                                 | Delmosart                    |
| Methylphenidate | EQM/11858NEMIS  | Equasym XI M/R capsules 20 mg                               | Equasym XI                   |

|                 |                |                                                         |                               |
|-----------------|----------------|---------------------------------------------------------|-------------------------------|
| Methylphenidate | EQM/19955NEMIS | Equasym XI M/R capsules 10 mg                           | Equasym XI                    |
| Methylphenidate | EQM/19956NEMIS | Equasym XI M/R capsules 30 mg                           | Equasym XI                    |
| Methylphenidate | EQTA4119NEMIS  | Equasym Tablets 5 mg                                    | Equasym                       |
| Methylphenidate | EQTA4120NEMIS  | Equasym Tablets 10 mg                                   | Equasym                       |
| Methylphenidate | EQTA4121NEMIS  | Equasym Tablets 20 mg                                   | Equasym                       |
| Methylphenidate | MAM/95145NEMIS | Matoride XI M/R tablets 36 mg                           | Matoride XI                   |
| Methylphenidate | MAM/95147NEMIS | Matoride XI M/R tablets 54 mg                           | Matoride XI                   |
| Methylphenidate | MAM/96294NEMIS | Matoride XI M/R tablets 18 mg                           | Matoride XI                   |
| Methylphenidate | MEM/11856NEMIS | Methylphenidate Hydrochloride M/R capsules 20 mg        | Methylphenidate Hydrochloride |
| Methylphenidate | MEM/12670NEMIS | Methylphenidate Hydrochloride M/R tablets 18 mg         | Methylphenidate Hydrochloride |
| Methylphenidate | MEM/12673NEMIS | Methylphenidate Hydrochloride M/R tablets 36 mg         | Methylphenidate Hydrochloride |
| Methylphenidate | MEM/15526NEMIS | Methylphenidate Hydrochloride M/R tablets 20 mg         | Methylphenidate Hydrochloride |
| Methylphenidate | MEM/19953NEMIS | Methylphenidate Hydrochloride M/R capsules 10 mg        | Methylphenidate Hydrochloride |
| Methylphenidate | MEM/19954NEMIS | Methylphenidate Hydrochloride M/R capsules 30 mg        | Methylphenidate Hydrochloride |
| Methylphenidate | MEM/23817NEMIS | Methylphenidate Hydrochloride M/R tablets 27 mg         | Methylphenidate Hydrochloride |
| Methylphenidate | MEM/24746NEMIS | Methylphenidate Hydrochloride M/R capsules 40 mg        | Methylphenidate Hydrochloride |
| Methylphenidate | MEM/24747NEMIS | Medikinet XI M/R capsules 10 mg                         | Medikinet XI                  |
| Methylphenidate | MEM/24748NEMIS | Medikinet XI M/R capsules 20 mg                         | Medikinet XI                  |
| Methylphenidate | MEM/24749NEMIS | Medikinet XI M/R capsules 30 mg                         | Medikinet XI                  |
| Methylphenidate | MEM/24750NEMIS | Medikinet XI M/R capsules 40 mg                         | Medikinet XI                  |
| Methylphenidate | MEM/51599NEMIS | Methylphenidate Hydrochloride M/R capsules 5 mg         | Methylphenidate Hydrochloride |
| Methylphenidate | MEM/51600NEMIS | Medikinet XI M/R capsules 5 mg                          | Medikinet XI                  |
| Methylphenidate | MEM/90836NEMIS | Methylphenidate Hydrochloride M/R capsules 50 mg        | Methylphenidate Hydrochloride |
| Methylphenidate | MEM/90837NEMIS | Methylphenidate Hydrochloride M/R capsules 60 mg        | Methylphenidate Hydrochloride |
| Methylphenidate | MEM/90838NEMIS | Medikinet XI M/R capsules 50 mg                         | Medikinet XI                  |
| Methylphenidate | MEM/90839NEMIS | Medikinet XI M/R capsules 60 mg                         | Medikinet XI                  |
| Methylphenidate | MEM/95146NEMIS | Methylphenidate Hydrochloride M/R tablets 54 mg         | Methylphenidate Hydrochloride |
| Methylphenidate | MEOR30805NEMIS | Methylphenidate Hydrochloride Oral solution 5 mg/5 ml   | Methylphenidate Hydrochloride |
| Methylphenidate | MEOR95955NEMIS | Methylphenidate Hydrochloride Oral suspension 5 mg/5 ml | Methylphenidate Hydrochloride |

|                 |                 |                                                            |                               |
|-----------------|-----------------|------------------------------------------------------------|-------------------------------|
| Methylphenidate | META23980EMIS   | Methylphenidate Hydrochloride Tablets 10 mg                | Methylphenidate Hydrochloride |
| Methylphenidate | META24742NEMIS  | Medikinet Tablets 5 mg                                     | Medikinet                     |
| Methylphenidate | META24743NEMIS  | Medikinet Tablets 10 mg                                    | Medikinet                     |
| Methylphenidate | META24744NEMIS  | Medikinet Tablets 20 mg                                    | Medikinet                     |
| Methylphenidate | META36026MGEMIS | Methylphenidate Hydrochloride Tablets 10 mg (A.A.H. Pharm) | Methylphenidate Hydrochloride |
| Methylphenidate | META36027MGEMIS | Methylphenidate Hydrochloride Tablets 10 mg (Unichem)      | Methylphenidate Hydrochloride |
| Methylphenidate | META36028MGEMIS | Methylphenidate Hydrochloride Tablets 10 mg (Teva UK)      | Methylphenidate Hydrochloride |
| Methylphenidate | META37714MGEMIS | Methylphenidate Hydrochloride Tablets 5 mg (A.A.H. Pharm)  | Methylphenidate Hydrochloride |
| Methylphenidate | META37715MGEMIS | Methylphenidate Hydrochloride Tablets 20 mg (A.A.H. Pharm) | Methylphenidate Hydrochloride |
| Methylphenidate | META4114NEMIS   | Methylphenidate Hydrochloride Tablets 5 mg                 | Methylphenidate Hydrochloride |
| Methylphenidate | META4116NEMIS   | Methylphenidate Hydrochloride Tablets 20 mg                | Methylphenidate Hydrochloride |
| Methylphenidate | RIM/12595NEMIS  | Ritalin Sr M/R tablets 20 mg                               | Ritalin Sr                    |
| Methylphenidate | RITA23978EMIS   | Ritalin Tablets 10 mg                                      | Ritalin                       |
| Methylphenidate | TRTA13267NEMIS  | Tranquilyn Tablets 5 mg                                    | Tranquilyn                    |
| Methylphenidate | TRTA13268NEMIS  | Tranquilyn Tablets 10 mg                                   | Tranquilyn                    |
| Methylphenidate | TRTA13269NEMIS  | Tranquilyn Tablets 20 mg                                   | Tranquilyn                    |
| Methylphenidate | XAM/123300NEMIS | Xaggitin XI M/R tablets 18 mg                              | Xaggitin XI                   |
| Methylphenidate | XAM/123301NEMIS | Xaggitin XI M/R tablets 27 mg                              | Xaggitin XI                   |
| Methylphenidate | XAM/123302NEMIS | Xaggitin XI M/R tablets 36 mg                              | Xaggitin XI                   |
| Methylphenidate | XAM/123303NEMIS | Xaggitin XI M/R tablets 54 mg                              | Xaggitin XI                   |
| Methylphenidate | XEM/105347NEMIS | Xenidate XI M/R tablets 54 mg                              | Xenidate XI                   |
| Methylphenidate | XEM/115292NEMIS | Xenidate XI M/R tablets 27 mg                              | Xenidate XI                   |
| Methylphenidate | XEM/95188NEMIS  | Xenidate XI M/R tablets 18 mg                              | Xenidate XI                   |
| Methylphenidate | XEM/95189NEMIS  | Xenidate XI M/R tablets 36 mg                              | Xenidate XI                   |
